# Supplementary material for: Noninvasive diagnosis of secondary infections in COVID-19 by sequencing of plasma microbial cell-free DNA
Source: PubMed Central journal article supplement — iScience. 2023 Oct 11;26(11):108093. doi: 10.1016/j.isci.2023.108093 (PMC10641743; doi:10.1016/j.isci.2023.108093), 2023-10-11
Supplement: mmc1.pdf [file mmc1.pdf]

## **Supplemental information**

### **Noninvasive diagnosis of secondary infections in COVID-19 by sequencing of plasma microbial cell-free DNA**

**Grace Lisius, Radha Duttagupta, Asim A. Ahmed, Matthew Hensley, Nameer Al-Yousif, Michael Lu, William Bain, Faraaz Shah, Timothy A. Blauwkamp, Sivan Bercovici, Caitlin Schaefer, Shulin Qin, Xiaohong Wang, Yingze Zhang, Kevin J. Mitchell, Ellen K. Hughes, Jana L. Jacobs, Asma Naqvi, Ghady Haidar, John W. Mellors, Barbara Methé, Bryan J. McVerry, Alison Morris, and Georgios D. Kitsios**

**SUPPLEMENT:**

**Table S1: Baseline characteristics by sequencing run success, related to Table 1.**

| Variable                                          | Pass                         | Pass Qualitatively            | Fail                          | P-value         |
|---------------------------------------------------|------------------------------|-------------------------------|-------------------------------|-----------------|
| N                                                 | 25                           | 5                             | 12                            |                 |
| Men, n (%)                                        | 20 (64.5)                    | 1 (20.0)                      | 8 (61.5)                      | 0.12            |
| Age (median [IQR])                                | 68.7 [60.2, 76.8]            | 78.4 [63.1, 86.8]             | 58.5 [57.2, 64.7]             | <b>0.04</b>     |
| BMI (median [IQR])                                | 31.6 [26.4, 34.0]            | 30.1 [26.8, 36.4]             | 39.6 [28.7, 42.4]             | 0.35            |
| Diabetes, n (%)                                   | 11 (44.0)                    | 3 (60.0)                      | 4 (33.3)                      | 0.59            |
| COPD, n (%)                                       | 9 (36.0)                     | 1 (20.0)                      | 0 (0.0)                       | <b>0.05</b>     |
| Immunosuppression, n (%)                          | 2 (8.0)                      | 1 (20.0)                      | 1 (8.3)                       | 0.7             |
| Invasive Mechanical Ventilation, n (%)            | 14 (56.0)                    | 4 (80.0)                      | 9 (75.0)                      | 0.39            |
| ECMO, n (%)                                       | 3 (12.0)                     | 1 (20.0)                      | 4 (33.3)                      | 0.3             |
| WBC (median [IQR])                                | 9.4 [6.3, 11.8]              | 11.1 [11.1, 11.5]             | 10.2 [7.4, 13.7]              | 0.46            |
| WHO ordinal scale at ICU admission (median [IQR]) | 5.0 [5.0, 6.0]               | 5.5 [5.0, 6.5]                | 7.0 [6.0, 8.5]                | <b>0.01</b>     |
| RALE score (median [IQR])                         | 22.5 [21.0, 28.0]            | 23.0 [22.8, 24.0]             | 27.5 [20.6, 35.8]             | 0.56            |
| SARS-CoV-2 RNA in Plasma (cps/mL, median [IQR])   | 196.5 [3.0, 3349.0]          | 6352.0 [3286.0, 26029.3]      | 2491.0 [335.0, 6874.5]        | 0.3             |
| IL6 pg/ml (median [IQR])                          | 33.9 [16.9, 124.9]           | 165.7 [89.7, 1109.9]          | 51.1 [15.7, 221.3]            | 0.19            |
| IL8 pg/ml (median [IQR])                          | 22.2 [13.9, 33.6]            | 35.9 [29.9, 181.2]            | 17.6 [15.1, 62.3]             | 0.29            |
| ST2 pg/ml (median [IQR])                          | 142138.6 [78170.4, 198277.7] | 253415.2 [218252.9, 578677.0] | 287500.3 [216718.3, 328329.0] | <b>&lt;0.01</b> |
| TNFR1 pg/ml (median [IQR])                        | 4186.0 [3555.3, 7971.9]      | 9493.9 [6465.9, 12598.6]      | 4919.9 [3417.1, 6956.2]       | 0.44            |
| SPD pg/ml (median [IQR])                          | 24.3 [10.0, 43.0]            | 80.5 [20.8, 141.9]            | 26.0 [13.2, 53.1]             | 0.46            |
| RAGE pg/ml (median [IQR])                         | 4245.9 [2419.5, 9023.2]      | 4518.6 [2410.7, 9982.9]       | 5518.4 [2884.1, 7936.1]       | 0.97            |
| Ang-2 pg/ml (median [IQR])                        | 3905.8 [1935.6, 7130.4]      | 4505.1 [3942.7, 8903.3]       | 4543.4 [2886.8, 10443.9]      | 0.5             |
| Procalcitonin pg/ml (median [IQR])                | 280.0 [167.0, 558.5]         | 3630.8 [1767.8, 4556.7]       | 580.8 [240.5, 1478.0]         | <b>0.01</b>     |

|                                               |                          |                           |                           |                 |
|-----------------------------------------------|--------------------------|---------------------------|---------------------------|-----------------|
| Pentraxin-3 pg/ml (median [IQR])              | 6085.9 [2937.8, 13127.0] | 19508.6 [6766.4, 32196.3] | 12979.7 [7122.9, 18778.3] | 0.1             |
| Human cfDNA MPM (median [IQR])                | 200.3 [91.3, 424.2]      | 722.2 [686.2, 1299.7]     | 1343.1 [949.5, 3731.9]    | <b>&lt;0.01</b> |
| Total microbial cfDNA MPM (median [IQR])      | 794.8 [1.0, 1863.1]      | 1480.8 [818.1, 21805.9]   | NA                        | NA              |
| Bacterial cfDNA MPM (median [IQR])            | 252.3 [1.0, 1343.9]      | 1480.8 [537.1, 21805.9]   | NA                        | NA              |
| Fungal cfDNA MPM (median [IQR])               | 1.0 [1.0, 1.0]           | 1.0 [1.0, 1.0]            | NA                        | NA              |
| Respiratory pathogen cfDNA MPM (median [IQR]) | 1.0 [1.0, 1015.8]        | 1480.8 [1.0, 21805.9]     | NA                        | NA              |

P-values significant below threshold of 0.05 are shown in bold. Abbreviations: Microbiologically-Diagnosed Secondary Infection (Micro-SI);

Clinically-Diagnosed secondary infections (Clinical-SI); No Clinical Suspicion for SI (No-Suspected-SI); chronic obstructive pulmonary disease (COPD); extracorporeal membrane oxygenation (ECMO); Radiographic Assessment of Lung Edema score (RALE score); receptor for advanced glycation end products (RAGE); suppression of tumorigenicity (ST-2); tumour necrosis factor receptor (TNFR-1); Surfactant Protein D (SPD); molecules per microliter (MPMs).

Figure S1. Host response plasma biomarker comparisons between clinical groups, related to Table 1.

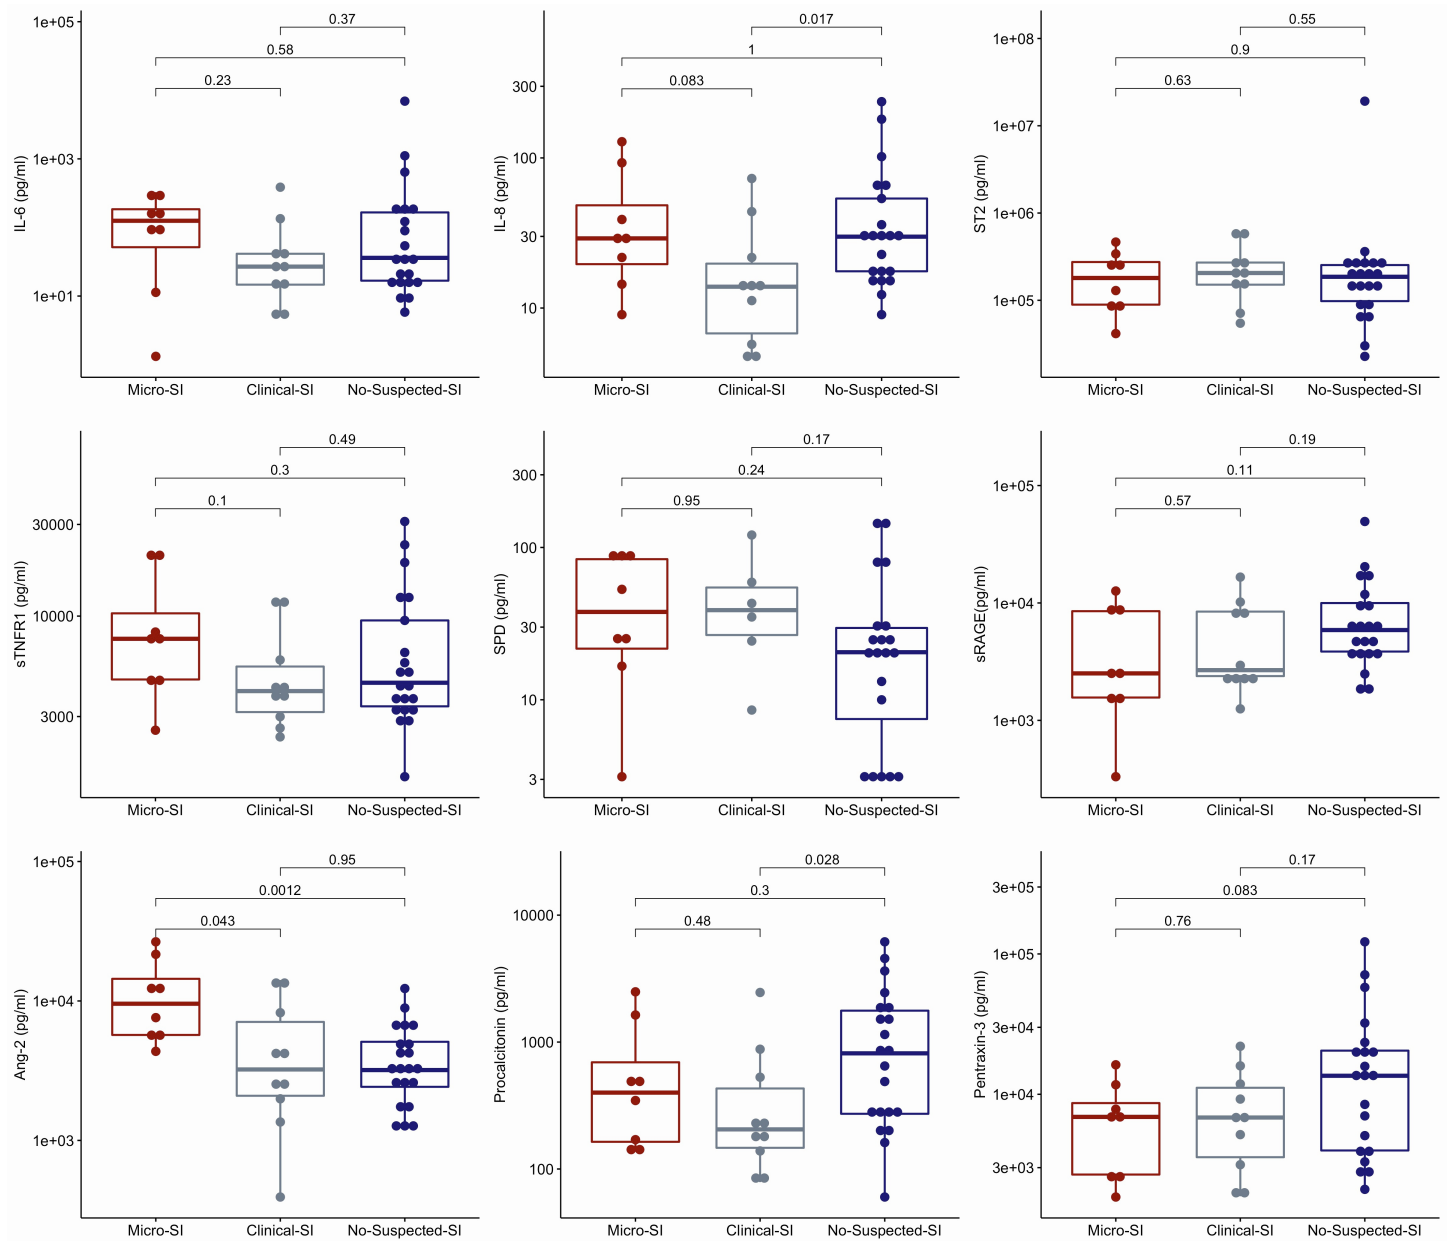

Figure S2: Comparisons of host response plasma biomarkers by WHO ordinal scale of severity at the time of admission (levels 4-9), related to Table 1.

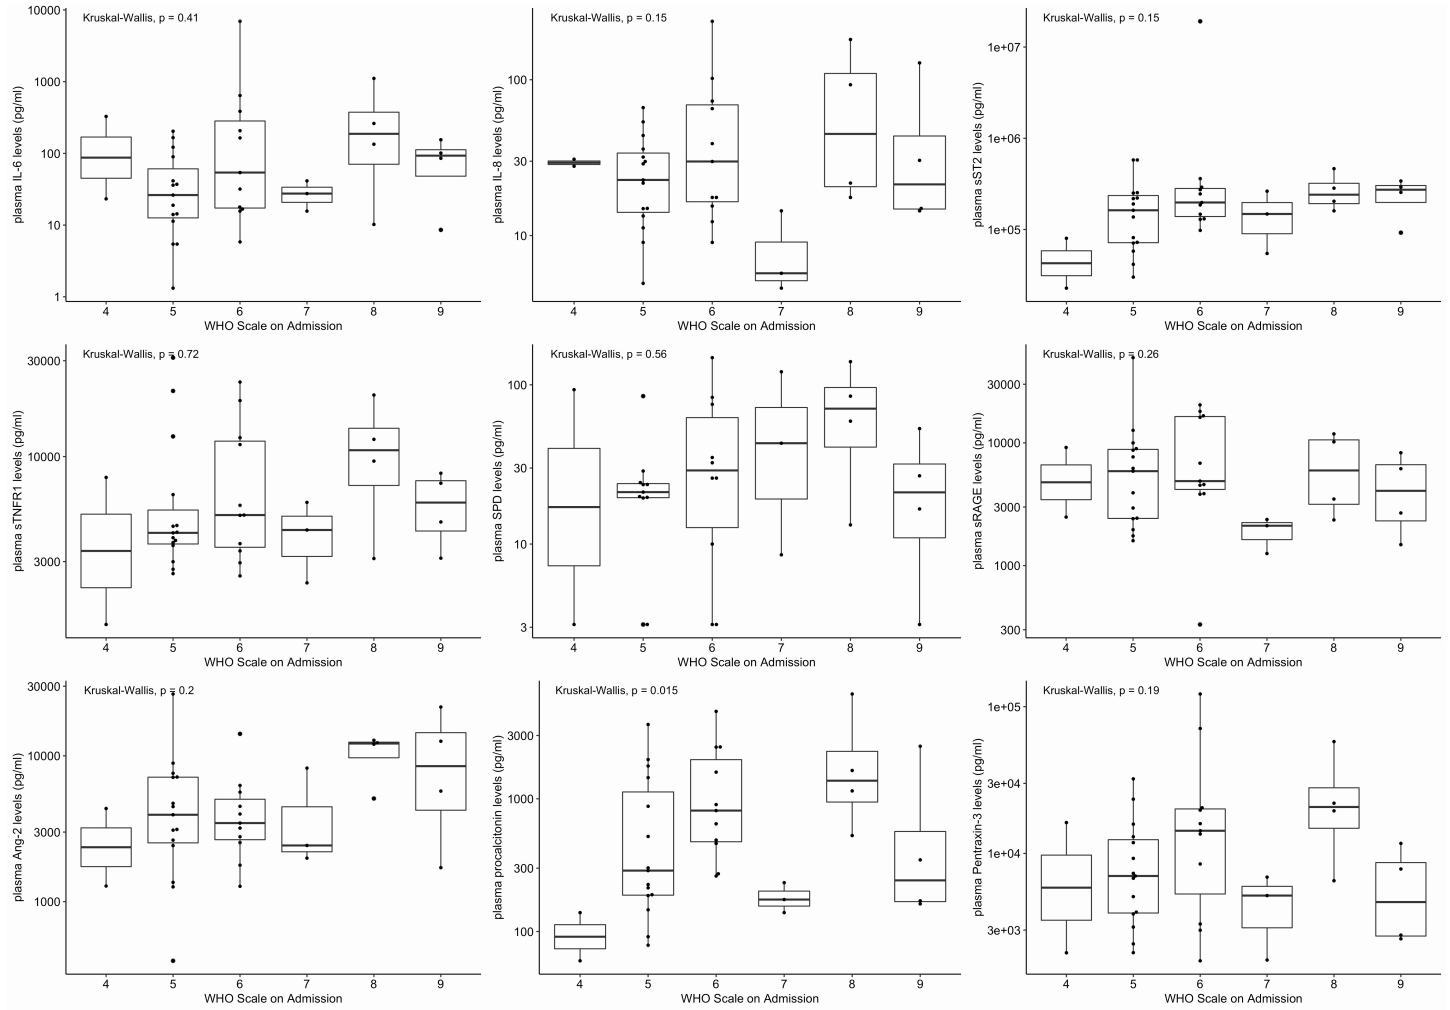

Figure S3: Comparisons of host response plasma biomarkers by the level of respiratory support required at the time of sampling (ECMO vs. Invasive Mechanical Ventilation [IMV] or non-invasive support), related to Table 1.

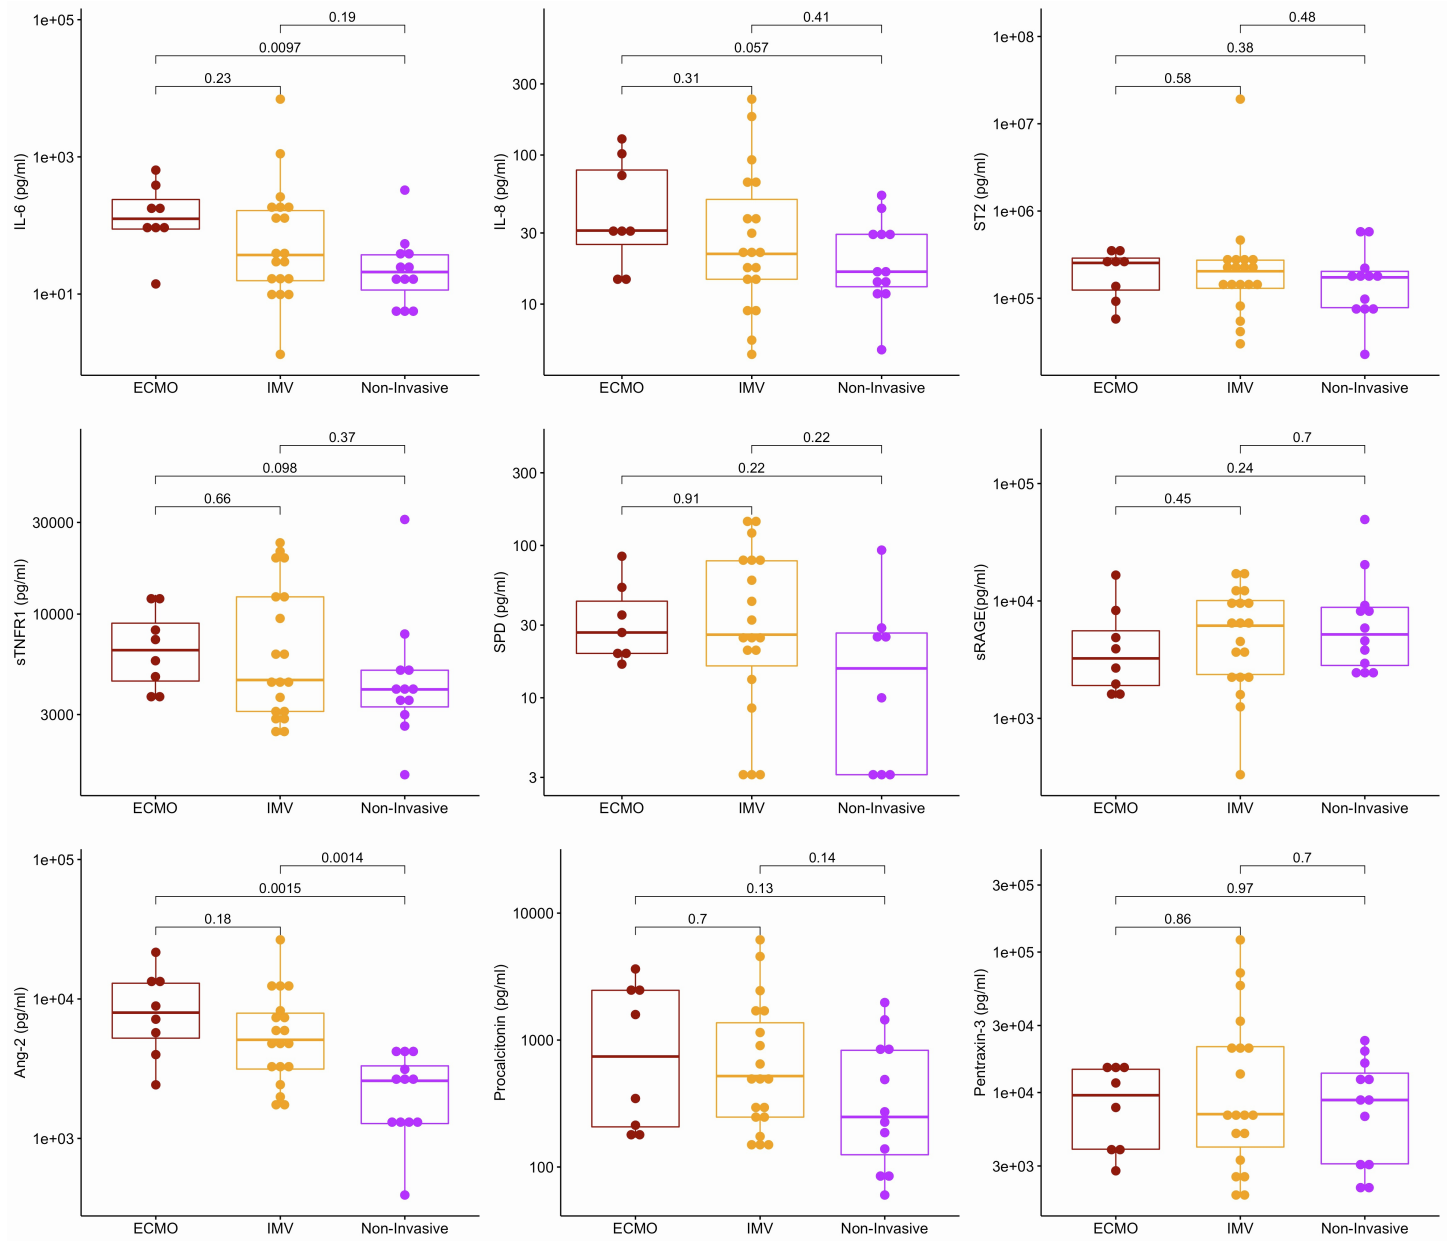

Figure S4: Successful plasma metagenomic sequencing runs had significantly lower levels of human cell-free DNA compared to unsuccessful runs, related to Table 1 and Figure 2. We classified the derived metagenomic sequences as human (hcfDNA) vs. microbial (mcfDNA), expressed as molecules per microliter (MPMs). Based on meeting minimum sequencing coverage metric required for quality control, we classified sequencing runs as successful (“Pass”), “Qualitatively Pass” or “Failed”. Baseline “Pass” samples had significantly lower hcfDNA compared to “Qualitatively Pass” or “Failed” samples (Wilcoxon test pairs  $p < 0.001$ , panel A). We also found that among subjects with both Day 1 and Day 5 samples, those samples that failed on both time points per subject (i.e. “0” sequencing success in panel B) had significantly higher hcfDNA levels compared to “Pass” samples on both days (Wilcoxon  $p$ -value  $< 0.001$ ). Data in boxplots are represented as individual values with median values and interquartile range depicted by the boxplots.

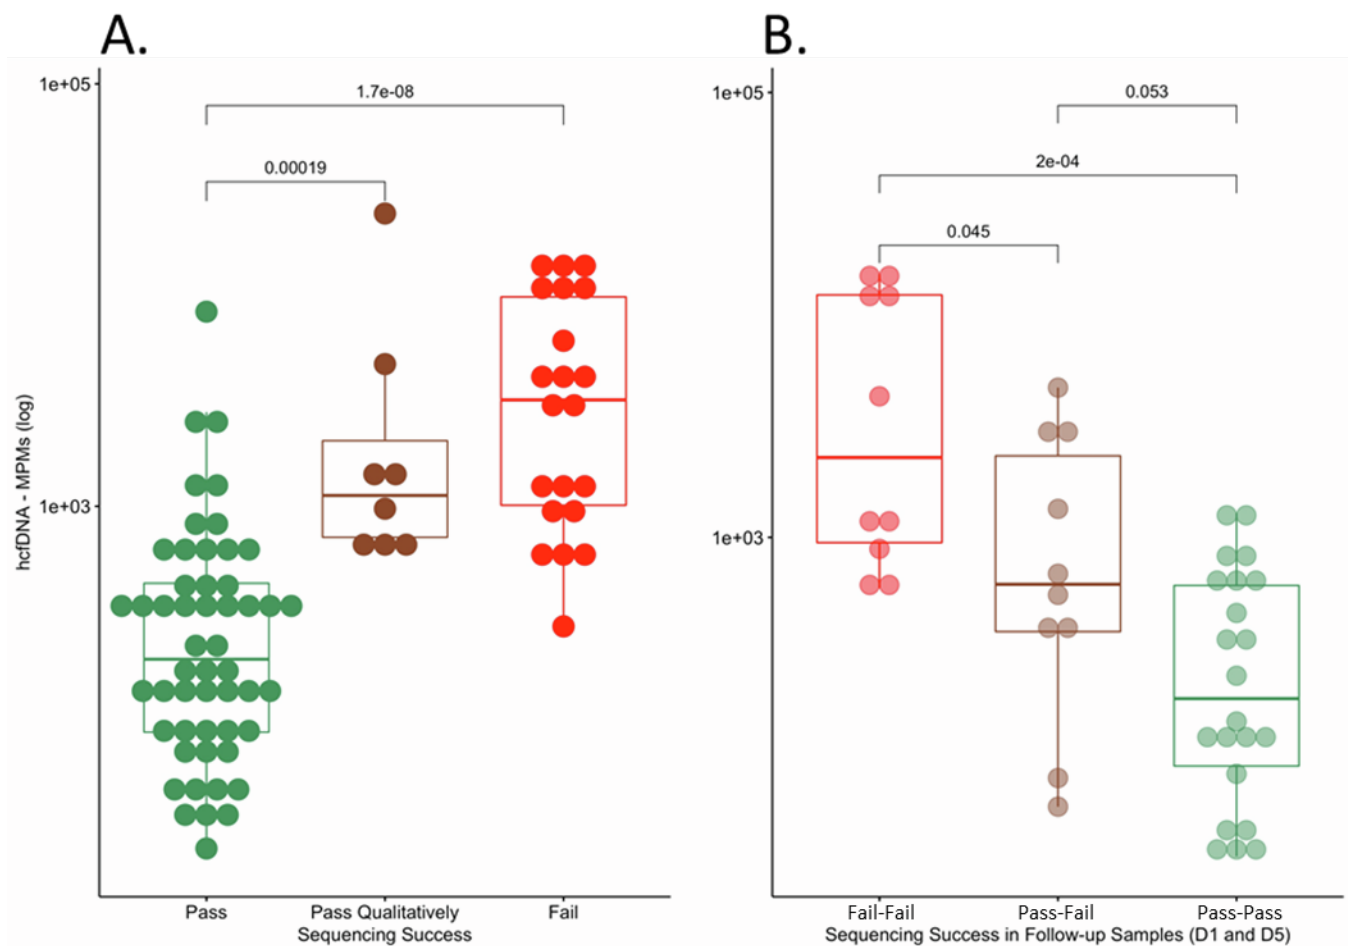





Figure S5: hcfDNA levels by sequencing run success, stratified by ECMO status, related to Table 1 and Figure 2. Data in boxplots are represented as individual values with median values and interquartile range depicted by the boxplots.

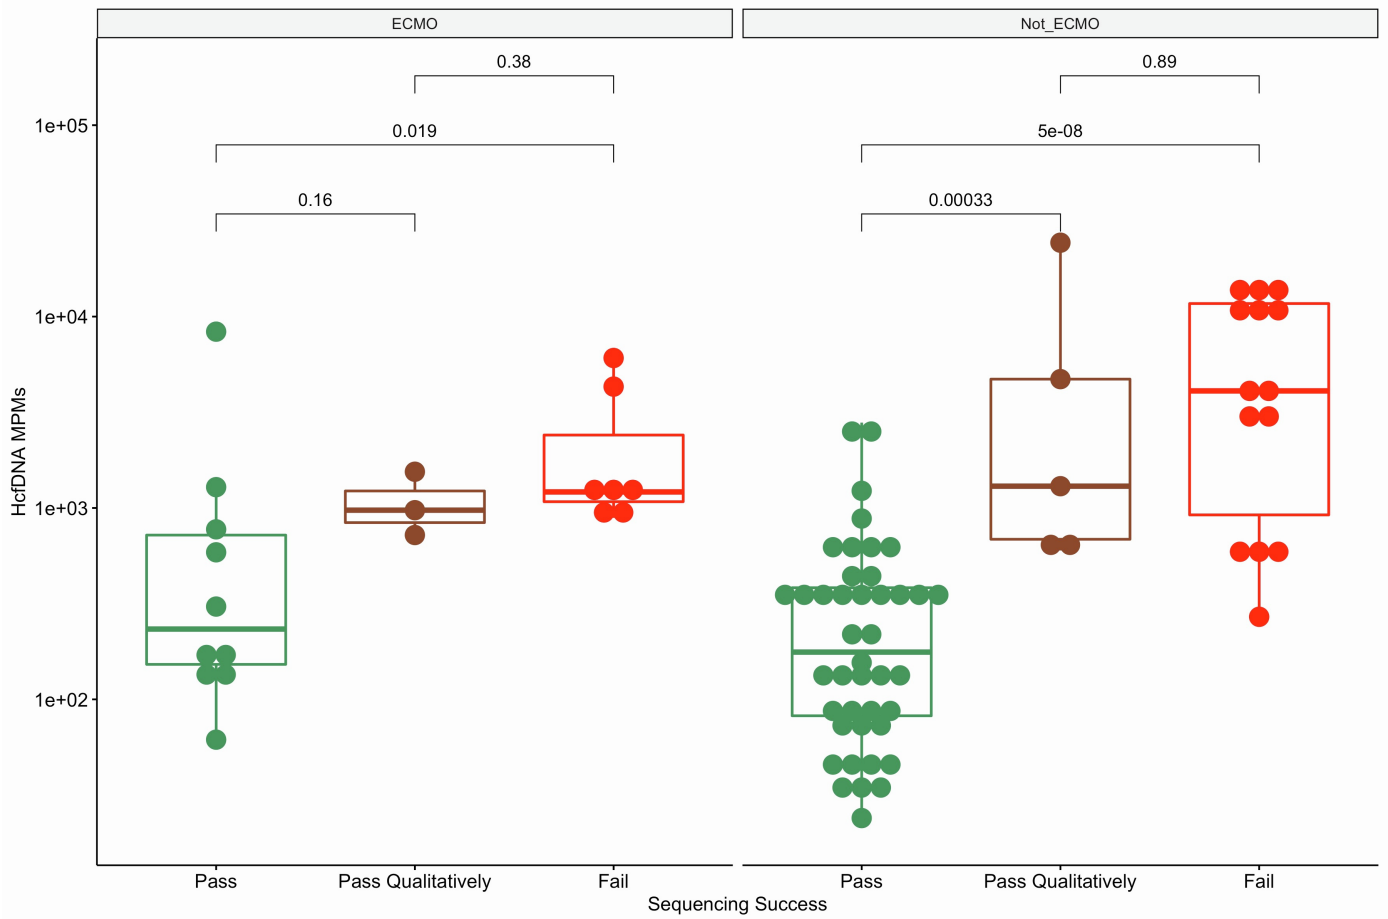

Figure S6: Subjects with COVID-19 have much higher levels of human cell-free DNA compared to non-COVID subjects with and without pneumonia, related to Table 1 and Figure 2. To contextualize the circulating cfDNA load in our COVID-19 cohort, we compared hcfDNA, total mcfDNA and pathogen mcfDNA MPMs between the COVID-19 SI categories against available published data from our group for mechanically ventilated patients with microbiologically-confirmed pneumonia (n=26, MCP), clinically-diagnosed pneumonia (n=41, CDP) and uninfected controls (n=16, intubated for airway protection or due to cardiogenic pulmonary edema). We found markedly higher levels of hcfDNA in subjects with COVID-19 compared to all non-COVID patient groups (p-values shown for the No-Suspected-SI only for parsimony). Non-COVID patients with microbiologically-confirmed pneumonia had higher mcfDNA levels compared to patients with COVID-19 with No-Suspected-SI, who in turn had markedly higher mcfDNA levels compared to uninfected controls. Data in boxplots are represented as individual values with median values and interquartile range depicted by the boxplots.

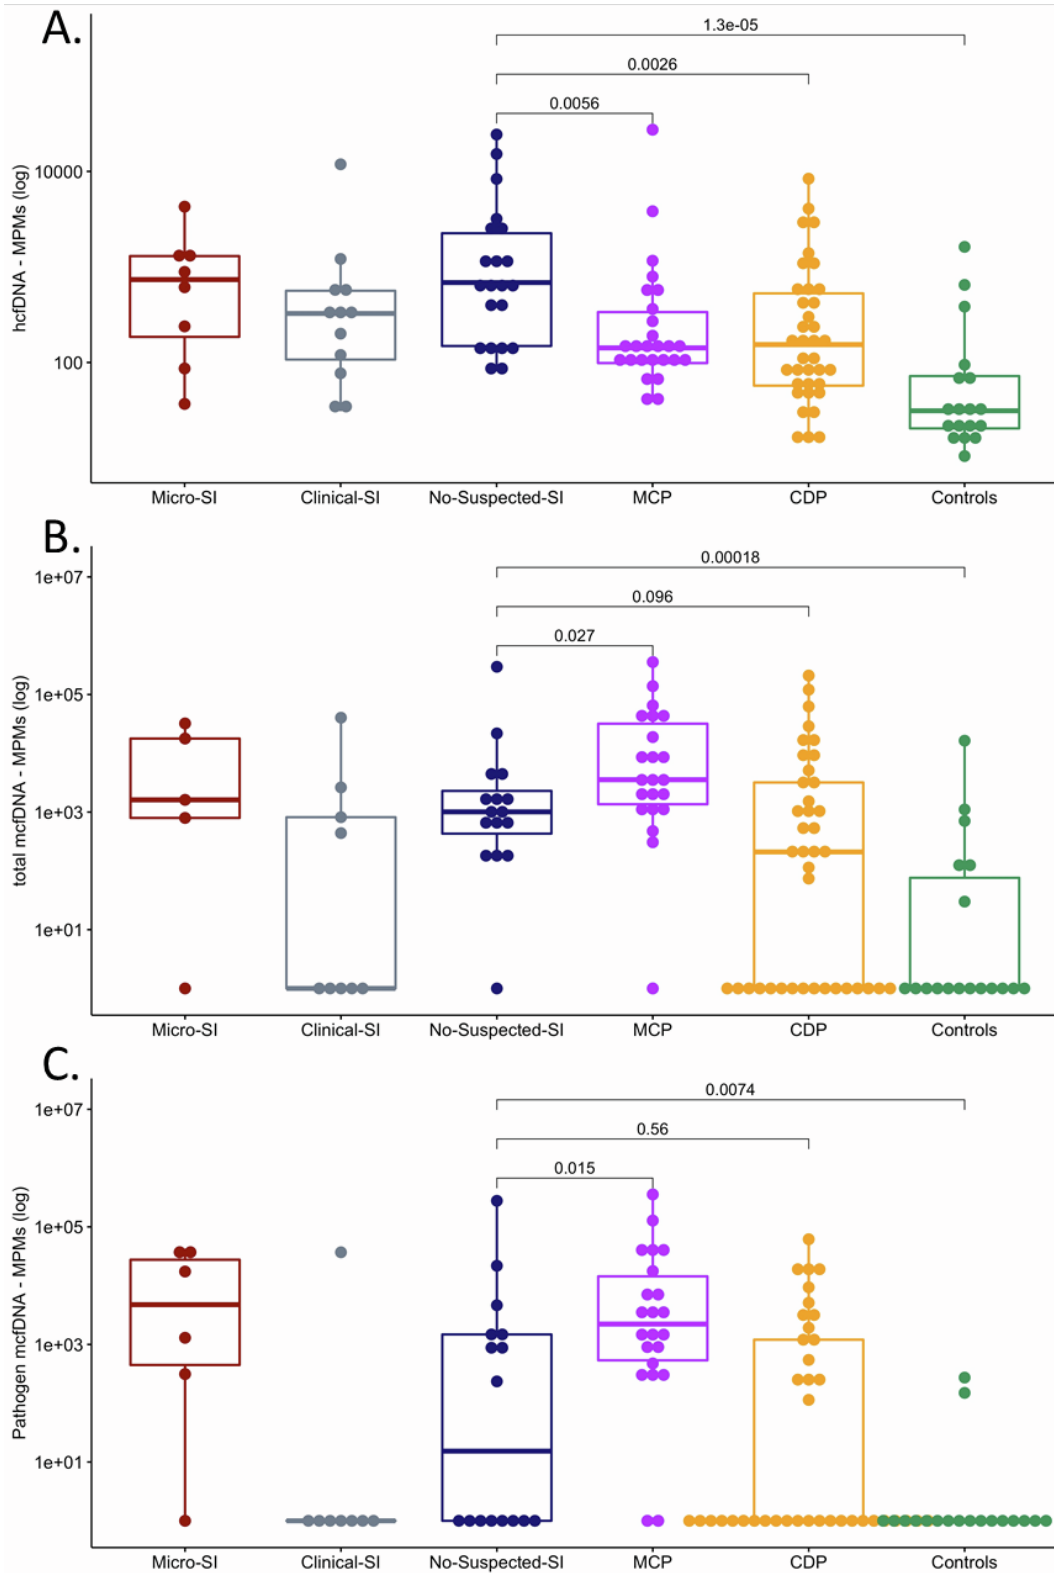

Figure S7: Longitudinal evaluation of SI classifications with corresponding changes in mcfDNA and hcfDNA levels, related to Figure 4. The Sankey plot shows the subjects who transitioned between SI categories throughout the study from days 1, to 5, and 10 (A). Height of bars represents number of subjects. Attrition occurred throughout the study leading to decreased height of day 5 and 10 nodes. HcfDNA was not significantly different among SI groups across the study period (B). Total mcfDNA was not significantly different among SI categories on enrollment (C). Micro-SI subjects had significantly higher total and pathogen mcfDNA versus No-Suspected-SI subjects at Day 5 (C, D).

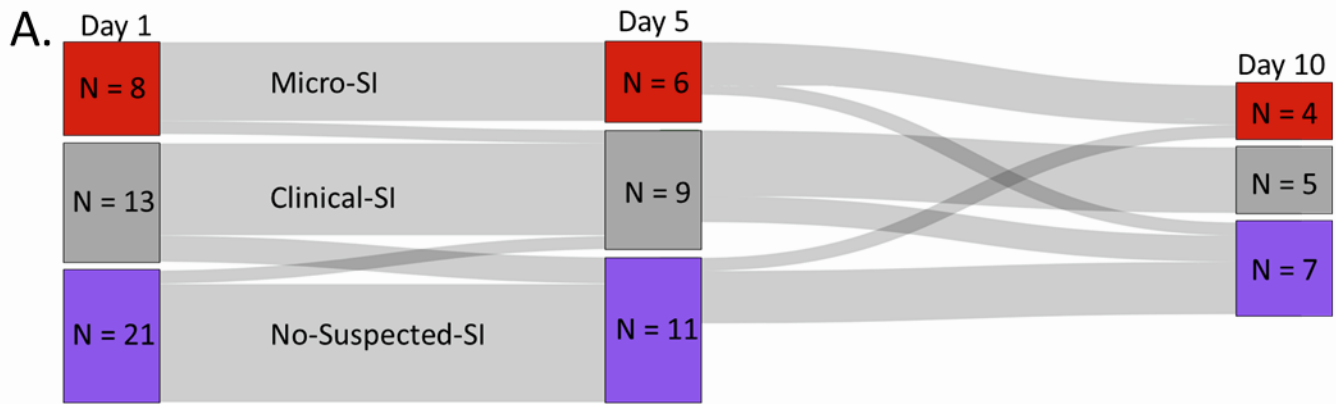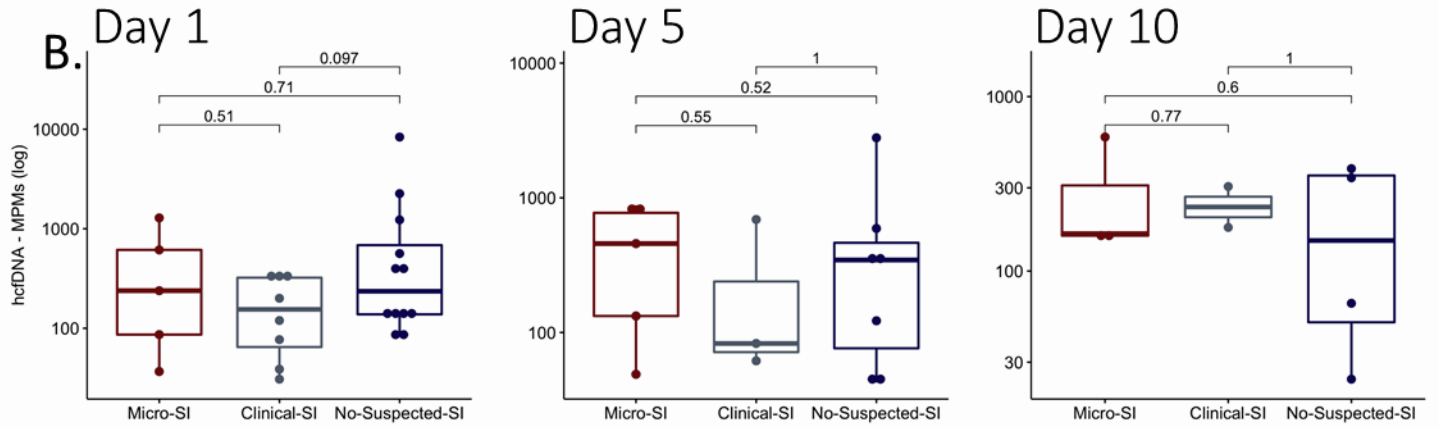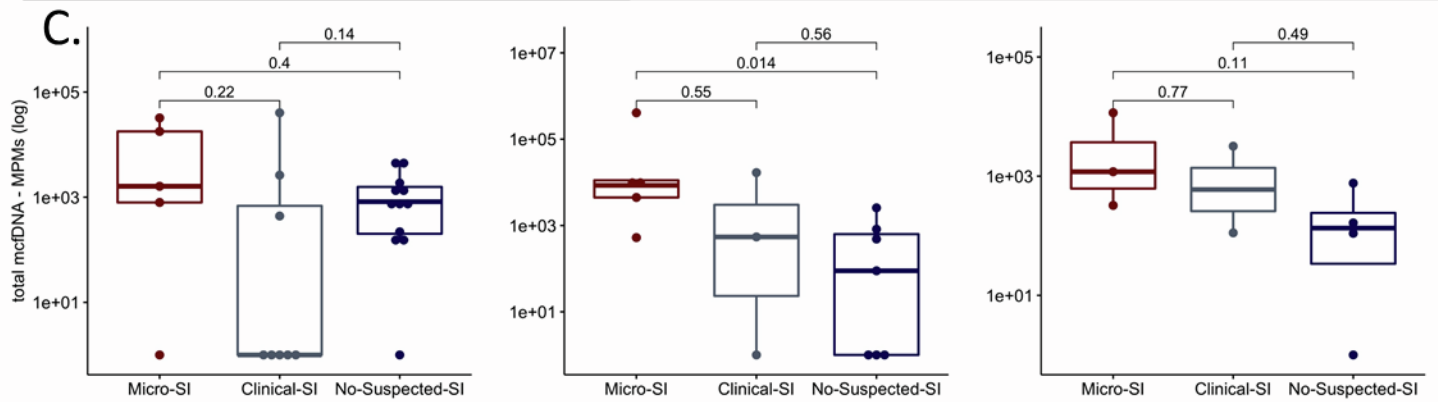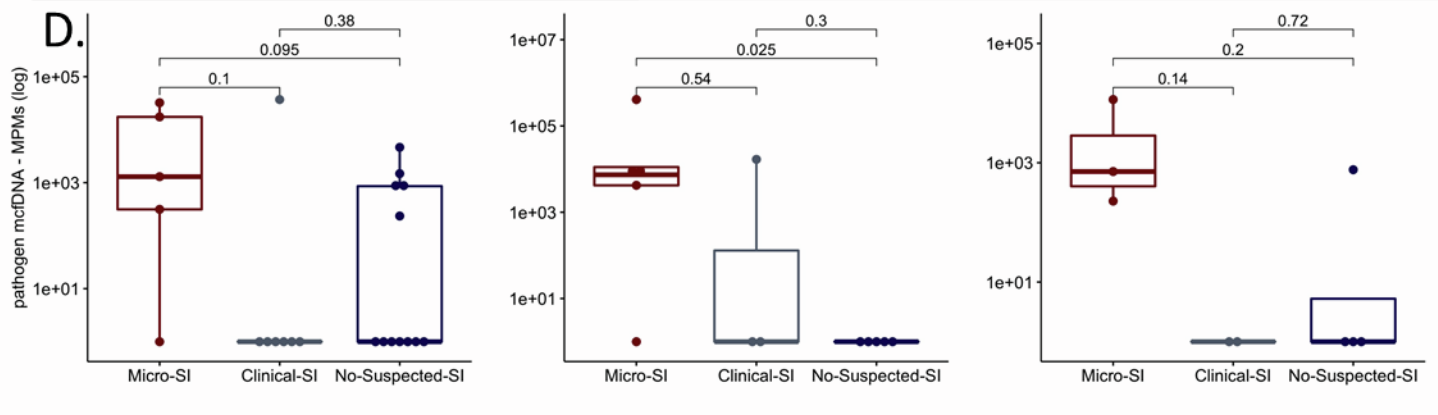

Figure S8: Human and total mcfDNA trajectories among survivors and non-survivors, related to Figure 6.

Trajectories of human cfDNA and total mcfDNA were not significantly different across the study period in survivors and non-survivors (A, B).

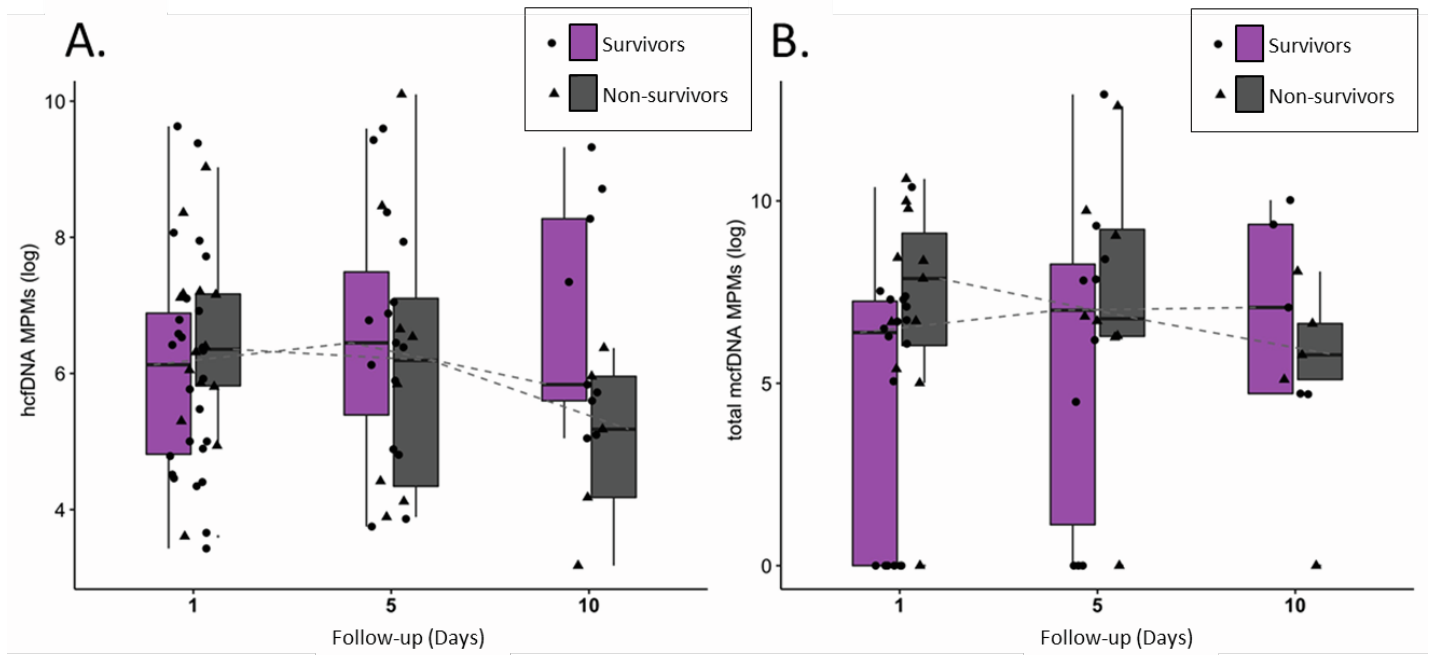

Table S2: Detailed results of mcfDNA positive/negative findings by SI category, among all sequenced samples and among “Pass” samples only, related to Figure 2.

|          | Samples                                                | All patients | Micro-SI | Clinical-SI | No-Suspected-SI | Fischer's p-value |
|----------|--------------------------------------------------------|--------------|----------|-------------|-----------------|-------------------|
| All      |                                                        | 82           | 22       | 23          | 37              |                   |
|          | Pass (% total)                                         | 52 (63)      | 16 (73)  | 13 (57)     | 23 (62)         | 0.54              |
|          | Pass, positive for mcfDNA (% of total pass samples)    | 40 (77)      | 15 (94)  | 7 (53)      | 18 (78)         | <b>0.04</b>       |
| Baseline |                                                        | 42           | 8        | 13          | 21              |                   |
|          | Pass (% baseline samples)                              | 25 (60)      | 5 (63)   | 8 (62)      | 12 (57)         | 1                 |
|          | Pass, positive for mcfDNA (% of baseline pass samples) | 18 (72)      | 4 (80)   | 3 (38)      | 11 (92)         | <b>0.02</b>       |

Table S4: Linear regression models for the adjusted effects of cfDNA (human and microbial) on host biomarkers when controlling for the plasma viral load variable, related to Figure 5. Significant results are highlighted in bold.

| Biomarker     | mcfDNA variable p-value | vRNA variable p-value |
|---------------|-------------------------|-----------------------|
| IL-6          | <b>0.007</b>            | 0.132                 |
| IL-8          | 0.085                   | 0.095                 |
| SPD           | <b>0.028</b>            | 0.206                 |
| Biomarker     | hcfDNA variable p-value | vRNA variable p-value |
| IL-6          | 0.076                   | 0.525                 |
| IL-8          | 0.093                   | 0.310                 |
| Procalcitonin | <b>0.003</b>            | 0.943                 |
| Pentraxin-3   | <b>0.0007</b>           | <b>0.037</b>          |



Table S5: Microbial species classifications, related to STAR methods.

| Taxon                               | Class                                    | Anatomic Compartment      |
|-------------------------------------|------------------------------------------|---------------------------|
| <i>Actinomyces graevenitzii</i>     | Recognized pathogen                      | Oral                      |
| <i>Actinomyces odontolyticus</i>    | Recognized pathogen                      | Oral                      |
| <i>Bacteroides ovatus</i>           | Microbe with unclear clinical importance | GI                        |
| <i>Bacteroides vulgatus</i>         | Microbe with unclear clinical importance | GI                        |
| <i>Burkholderia cepacia complex</i> | Recognized pathogen                      | Respiratory, Nosocomial   |
| <i>Candida parapsilosis</i>         | Microbe with unclear clinical importance | Skin, GI                  |
| <i>Candida tropicalis</i>           | Microbe with unclear clinical importance | Skin, GI                  |
| <i>Corynebacterium striatum</i>     | Microbe with unclear clinical importance | Skin                      |
| <i>Enterococcus faecalis</i>        | Recognized pathogen                      | GI                        |
| <i>Enterococcus faecium</i>         | Recognized pathogen                      | GI                        |
| <i>Escherichia coli</i>             | Recognized pathogen                      | GI                        |
| <i>Haemophilus influenzae</i>       | Recognized pathogen                      | Oral                      |
| <i>Haemophilus parahaemolyticus</i> | Microbe with unclear clinical importance | Oral                      |
| <i>Helicobacter pylori</i>          | Microbe with unclear clinical importance | GI                        |
| <i>Human herpesvirus 1</i>          | Microbe with unclear clinical importance | Unknown                   |
| <i>Human herpesvirus 4</i>          | Microbe with unclear clinical importance | Unknown                   |
| <i>Klebsiella pneumoniae</i>        | Recognized pathogen                      | Oral, GI                  |
| <i>Klebsiella variicola</i>         | Recognized pathogen                      | GI                        |
| <i>Lactobacillus gasseri</i>        | Microbe with unclear clinical importance | GI                        |
| <i>Pantoea ananatis</i>             | Microbe with unclear clinical importance | Unknown                   |
| <i>Pediococcus acidilactici</i>     | Microbe with unclear clinical importance | GI                        |
| <i>Prevotella bivia</i>             | Microbe with unclear clinical importance | Oral                      |
| <i>Prevotella denticola</i>         | Microbe with unclear clinical importance | Oral                      |
| <i>Prevotella oris</i>              | Microbe with unclear clinical importance | Oral                      |
| <i>Proteus mirabilis</i>            | Recognized pathogen                      | GI                        |
| <i>Pseudomonas aeruginosa</i>       | Recognized pathogen                      | GI, Pulmonary, Nosocomial |
| <i>Raoultella ornithinolytica</i>   | Recognized pathogen                      | GI                        |
| <i>Rothia mucilaginosa</i>          | Microbe with unclear clinical importance | Oral                      |
| <i>Staphylococcus aureus</i>        | Recognized pathogen                      | Skin                      |
| <i>Staphylococcus epidermidis</i>   | Microbe with unclear clinical importance | Skin                      |
| <i>Streptococcus gordonii</i>       | Microbe with unclear clinical importance | Oral                      |
| <i>Streptococcus infantarius</i>    | Microbe with unclear clinical importance | Oral                      |
| <i>Streptococcus mitis</i>          | Recognized pathogen                      | Oral, Skin                |
| <i>Streptococcus parasanguinis</i>  | Recognized pathogen                      | Oral                      |
| <i>Streptococcus salivarius</i>     | Microbe with unclear clinical importance | Oral                      |
| <i>Streptococcus sanguinis</i>      | Microbe with unclear clinical importance | Oral                      |
| <i>Streptococcus thermophilus</i>   | Microbe with unclear clinical importance | Oral                      |
| <i>Scardovia wiggsiae</i>           | Microbe with unclear clinical importance | Oral                      |

Table S6: References for pathogenic microbe classifications, related to STAR Methods.

| Species                             | Reference |
|-------------------------------------|-----------|
| <i>Actinomyces graevenitzii</i>     | 1         |
| <i>Actinomyces odontolyticus</i>    | 1         |
| <i>Burkholderia cepacia</i> complex | 2         |
| <i>Pediococcus acidilactici</i>     | 3         |
| <i>Prevotella bivia</i>             | 4         |
| <i>Prevotella denticola</i>         | 4         |
| <i>Raoultella ornithinolytica</i>   | 5         |
| <i>Scardovia wiggisiae</i>          | 6         |
| <i>Staphylococcus epidermidis</i>   | 7         |
| <i>Streptococcus gordonii</i>       | 8         |
| <i>Streptococcus infantarius</i>    | 9         |
| <i>Streptococcus sanguinis</i>      | 10        |

## References:

- S1. Hall, V. (2008). Actinomyces—gathering evidence of human colonization and infection. *Anaerobe* 14, 1-7.
- S2. Tavares, M., Kozak, M., Balola, A., and Sá-Correia, I. (2020). Burkholderia cepacia complex bacteria: a feared contamination risk in water-based pharmaceutical products. *Clinical microbiology reviews* 33, e00139-00119.
- S3. Reuben, R.C., Roy, P.C., Sarkar, S.L., Alam, R.U., and Jahid, I.K. (2019). Isolation, characterization, and assessment of lactic acid bacteria toward their selection as poultry probiotics. *BMC Microbiol* 19, 253. 10.1186/s12866-019-1626-0.
- S4. Könönen, E., and Gursoy, U.K. (2021). Oral Prevotella species and their connection to events of clinical relevance in gastrointestinal and respiratory tracts. *Frontiers in Microbiology* 12.
- S5. Hajjar, R., Ambaraghassi, G., Sebahang, H., Schwenter, F., and Su, S.-H. (2020). Raoultella ornithinolytica: emergence and resistance. *Infection and Drug Resistance* 13, 1091.
- S6. Kameda, M., Abiko, Y., Washio, J., Tanner, A.C.R., Kressirer, C.A., Mizoguchi, I., and Takahashi, N. (2020). Sugar Metabolism of Scardovia wiggsiae, a Novel Caries-Associated Bacterium. *Front Microbiol* 11, 479. 10.3389/fmicb.2020.00479.
- S7. Otto, M. (2009). Staphylococcus epidermidis--the 'accidental' pathogen. *Nat Rev Microbiol* 7, 555-567. 10.1038/nrmicro2182.
- S8. Park, O.J., Kwon, Y., Park, C., So, Y.J., Park, T.H., Jeong, S., Im, J., Yun, C.H., and Han, S.H. (2020). Streptococcus gordonii: Pathogenesis and Host Response to Its Cell Wall Components. *Microorganisms* 8. 10.3390/microorganisms8121852.
- S9. Dos Santos, K.M.O., de Matos, C.R., Salles, H.O., de Melo Franco, B.D.G., Arellano, K., Holzapfel, W.H., and Todorov, S.D. (2020). Exploring Beneficial/Virulence Properties of Two Dairy-Related Strains of Streptococcus infantarius subsp. infantarius. *Probiotics Antimicrob Proteins* 12, 1524-1541. 10.1007/s12602-020-09637-8.
- S10. Zhu, B., Macleod, L.C., Kitten, T., and Xu, P. (2018). Streptococcus sanguinis biofilm formation & interaction with oral pathogens. *Future Microbiol* 13, 915-932. 10.2217/fmb-2018-0043.
